# Supplementary material for: The Holistic Health Status of Chinese Homosexual and Bisexual Adults: A Scoping Review
Source: PubMed Central journal article supplement (PMC8421524; doi:10.3389/fpubh.2021.710575), 2021-08-24
Supplement: Data_Sheet_7.pdf [file Data_Sheet_7.pdf]

## Co-word Analysis of Keywords and Detailed Concept characteristics

### Frequency of keywords in the included publications

Frequency of keywords in both included English and Chinese publications

| Chinese (N> 50) | F    | Both (N≥ 50)                    | F   | English (N≥ 15)                 | F   |
|-----------------|------|---------------------------------|-----|---------------------------------|-----|
| 男男性行为者 (MSM)    | 1572 | Men who have Sex with Men (MSM) | 190 | Men who have Sex with Men (MSM) | 372 |
| 艾滋病             | 820  | HIV                             | 723 | China                           | 226 |
| HIV             | 548  | AIDS                            | 607 | HIV                             | 174 |
| 影响因素            | 312  | Syphilis                        | 261 | Syphilis                        | 40  |
| 梅毒              | 266  | China                           | 224 | HIV/AIDS                        | 32  |
| 性行为             | 189  | Influencing Factor              | 219 | HIV Testing                     | 25  |
| 高危行为            | 174  | HIV/AIDS                        | 193 | Sexual Behavior                 | 24  |
| 同性恋             | 139  | Sexual Behavior                 | 164 | Sexual Orientation              | 23  |
| 男男性行为           | 136  | High Risk Behavior              | 122 | Stigma                          | 22  |
| AIDS 艾滋病        | 134  | Risk Factor                     | 117 | Condom Use                      | 21  |
| 危险性行为           | 125  | Male Homosexuality              | 98  | Gay                             | 20  |
| 男性              | 109  | Knowledge                       | 66  | Risk Behavior                   | 19  |
| 感染状况            | 105  | STI                             | 65  | Depression                      | 19  |
| 行为              | 99   | High Risk Sexual Behavior       | 65  | Pre-Exposure                    | 19  |
| 性传播疾病           | 85   | Behavior                        | 63  | Prophylaxis (PrEP)              |     |
| 危险因素            | 83   | Homosexuality                   | 58  | Internet                        | 19  |
| 安全套             | 80   | Prevalence                      | 57  | STI                             | 17  |
| 知识              | 77   | Condom                          | 54  | Homosexuality                   | 17  |
| 哨点监测            | 58   | Depression                      | 51  | HIV Prevention                  | 17  |
| HIV 病毒感染        | 52   | Infection                       | 51  | Mental Health                   | 16  |
| 干预              | 51   | HIV Infection                   | 50  |                                 |     |



## **Comparison of study focus of different gender groups**

Detailed and specific variables used in English publications

| <b>Variables in Male</b>     | <b>Frequency</b> | <b>Variables in Female</b> | <b>Frequency</b> |
|------------------------------|------------------|----------------------------|------------------|
| Sexual Behavior              | 214              | Sexual Behavior            | 3                |
| HIV Screening                | 107              | G-spot Exploration         | 2                |
| Condom Use                   | 91               | Sexual Self-Label          | 2                |
| HIV-testing Behavior         | 75               | Breast health              | 2                |
| Syphilis Screening           | 69               | Gender role                | 2                |
| Drug Use                     | 65               | Self Esteem                | 2                |
| Depression                   | 57               | Abnormalities              | 1                |
| HIV Knowledge                | 56               | Alcohol Use                | 1                |
| HIV Prevalence               | 54               | Anxiety and depression     | 1                |
| Risk Behavior                | 43               | App dating                 | 1                |
|                              |                  | Assisted reproductive      |                  |
| Syphilis Prevalence          | 31               | technology attitude        | 1                |
| Unprotected Anal Intercourse | 31               | Barriers to Screening      | 1                |
| Anxiety                      | 29               | Bisexual Behavior          | 1                |
| Social support               | 29               | Body image                 | 1                |
| Alcohol Use                  | 26               | Breast cancer knowledge    | 1                |
| HIV Attitude                 | 26               | Breast Feeling             | 1                |
| STI History                  | 24               | Breast Screening           | 1                |
| HIV/STI Status               | 23               | Childbearing Importance    | 1                |
| HIV Stigma                   | 20               | Closeted in the Family     | 1                |
| Coming Out                   | 15               | Coming Out                 | 1                |
| Commercial Sex               | 15               | Condom Use                 | 1                |
| HIV Status                   | 15               | Depression                 | 1                |
| MSM Behavior                 | 15               | Depression-Happiness       | 1                |
| MSW Behavior                 | 15               | Dispositional Hope         | 1                |
| Service Utilization          | 14               | Double Marginalisation     | 1                |
| HPV Screening                | 13               | Empathizing-Systemizing    | 1                |
| Intimate partner violence    | 13               | Family Support             | 1                |
| HIV Incidence                | 12               | Friends Support            | 1                |
| Quality of life              | 12               | Gender identity            | 1                |
| Social Network               | 12               | Health beliefs             | 1                |
| Condomless anal intercourse  | 11               | Information exposure       | 1                |
| HIV Influencing Factor       | 11               | Internalized Heterosexism  | 1                |
| School Bullying Experience   | 10               | Lesbian culture            | 1                |
| Community engagement         | 9                | Lesbian Identity           | 1                |
| Cyberbullying Experience     | 9                | Life Satisfaction          | 1                |
| Self-esteem                  | 9                | Mental health              | 1                |
| PrEP Knowledge               | 8                | Online relationship        | 1                |
| Sexual partner               | 8                | Partner support            | 1                |
| Willingness to use PrEP      | 8                | Redefinition of Marriage   | 1                |
| ...                          |                  | ...                        |                  |
